# Supplementary material
Source: publisher figshare collection journal article supplement (https://future-science-group.figshare.com/ndownloader/files/34609196)
Supplement: Supplementary file 1 [file 34609196]

**Supplementary Data**

**Supplementary Table 1. Antitumor activity**

|  | **Avelumab dose** | | | | |
| --- | --- | --- | --- | --- | --- |
| **3 mg/kg**  **Q2W**  **(n=3)** | **10 mg/kg**  **Q2W**  **(n=7)** | **20 mg/kg**  **Q2W**  **(n=6)** | **10 mg/kg**  **QW→Q2W**  **(n=8)** | **Total**  **(N=24)** |
| **BOR, n (%)**  CR  PR  SD  PD  NE | 0  0  2 (66.7)  1 (33.3)  0 | 0  0  3 (42.9)  4 (57.1)  0 | 0  1 (16.7)  2 (33.3)  3 (50.0)  0 | 0  0  2 (25.0)a  4 (50.0)  2 (25.0) | 0  1 (4.2)  9 (37.5)  12 (50.0)  2 (8.3) |
| **Confirmed ORR, n (%) [95% CI]** | 0  [0.0, 70.8] | 0  [0.0, 41.0] | 1 (16.7)  [0.4, 64.1] | 0  [0.0, 36.9] | 1 (4.2)  [0.1, 21.1] |
| **Confirmed DCR, n (%)** | 2 (66.7) | 3 (42.9) | 3 (50.0) | 2 (25.0) | 10 (41.7) |
| **Median PFS (95% CI), months** | 6.9 (1.4, NE) | 2.6 (1.3, 5.5) | 3.5 (0.9, NE) | 1.3 (1.3, NE) | 1.9 (1.3, 5.5) |
| **Median OS (95% CI), months** | NE (NE, NE) | NE (1.3, NE) | NE (1.3, NE) | NE (2.8, NE) | NE (9.6, NE) |

a Unconfirmed PR reported in 1 patient.

Abbreviations: BOR, best overall response; CR, complete response; DCR, disease control rate; NE, not evaluable; ORR, objective response rate; OS, overall survival; PD, progressive disease; PFS, progression-free survival; PR, partial response; Q2W, every 2 weeks; QW, every week; SD, stable disease.
